# Supplementary material
Source: publisher figshare collection journal article supplement (https://acs.figshare.com/ndownloader/files/4367689)
Supplement: Supplementary file 1 [file 4367689]

# Supporting Information

## Enhanced Protein Imprinting over Nanoparticles Functionalized with Non-covalent Template Sorption Groups

Guoqi Fu\*, Hongyan He, Zhihua Chai, Huachang Chen, Juan Kong, Yan Wang, Yizhe Jiang

*Key Laboratory of Functional Polymer Materials of Ministry of Education, Institute of  
Polymer Chemistry, Nankai University, Tianjin 300071, PR China*

**Table S-1.** Comparison of zeta-potentials and Lys sorption on silica nanoparticles  
functionalized differently.<sup>a</sup>

| Samples                | Zeta-potential<br>(mV) | Lys adsorbed<br>(mg/g) |
|------------------------|------------------------|------------------------|
| Silica                 | -39.43 ± 0.64          | 29.74 ± 0.67           |
| Silica-NH <sub>2</sub> | -11.70 ± 0.44          | <sup>b</sup>           |
| Silica-COOH            | -34.90 ± 0.35          | 39.48 ± 0.16           |

<sup>a</sup> Lys adsorption: 7 mg of particles incubated with 1.5 mL of Lys solution ( $C_i = 0.4$  mg/mL)  
using Tris buffer (10 mM, pH 7.0) at 25 °C for 1 h.

<sup>b</sup> too little to be detected.

---

\* Corresponding author. Tel.: +86 22 23501443; fax: +86 22 23501443.

E-mail address: [gqfu@nankai.edu.cn](mailto:gqfu@nankai.edu.cn) (G. Fu)

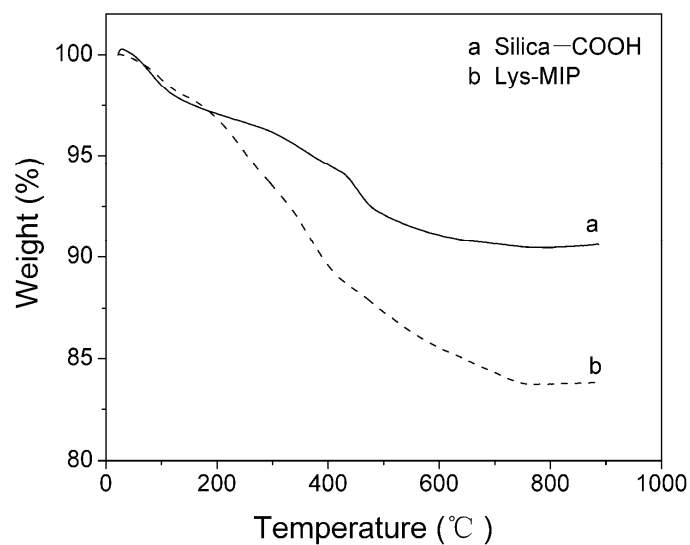

**Figure S-1.** TGA curves of (a) Silica-COOH particles, (b) Lys-imprinted particles.

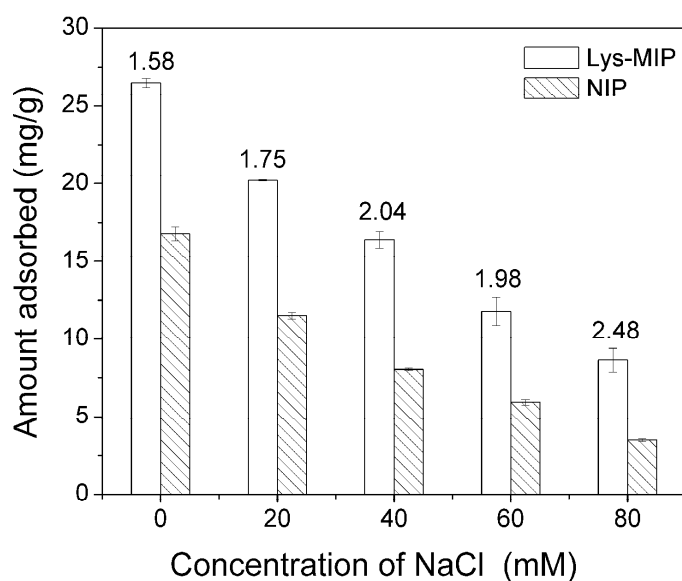

**Figure S-2.** The effects of NaCl concentration in the Lys solution on the rebinding capacity to the MIP and NIP particles. Adsorption conditions:  $V = 1.5$  mL,  $m = 7.0$  mg,  $C_0 = 0.4$  mg/mL, time 1 h, temperature 25 °C, Tris buffer(10 mM, pH 7.0). The imprinting factors are indicated above the bars.

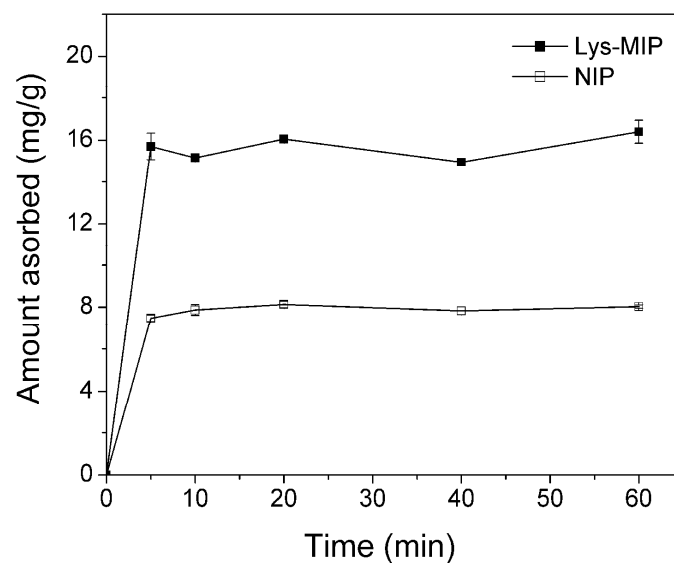

**Figure S-3.** Dynamic rebinding profiles of Lys on the imprinted and non-imprinted particles.

Adsorption conditions:  $V = 1.5$  mL,  $m = 7.0$  mg,  $C_0 = 0.4$  mg/g,  $C_{\text{NaCl}} = 40$  mM, time 1 h,

temperature 25 °C, Tris buffer(10 mM, pH 7.0).
